# Supplementary material for: Genome-wide discovery, and computational and transcriptional characterization of an AIG gene family in the freshwater snail Biomphalaria glabrata, a vector for Schistosoma mansoni
Source: PubMed Central journal article supplement (PMC7053062; doi:10.1186/s12864-020-6534-z), 2020-03-02

**Scaffold ID (number of AIG genes and partial AIGs)**

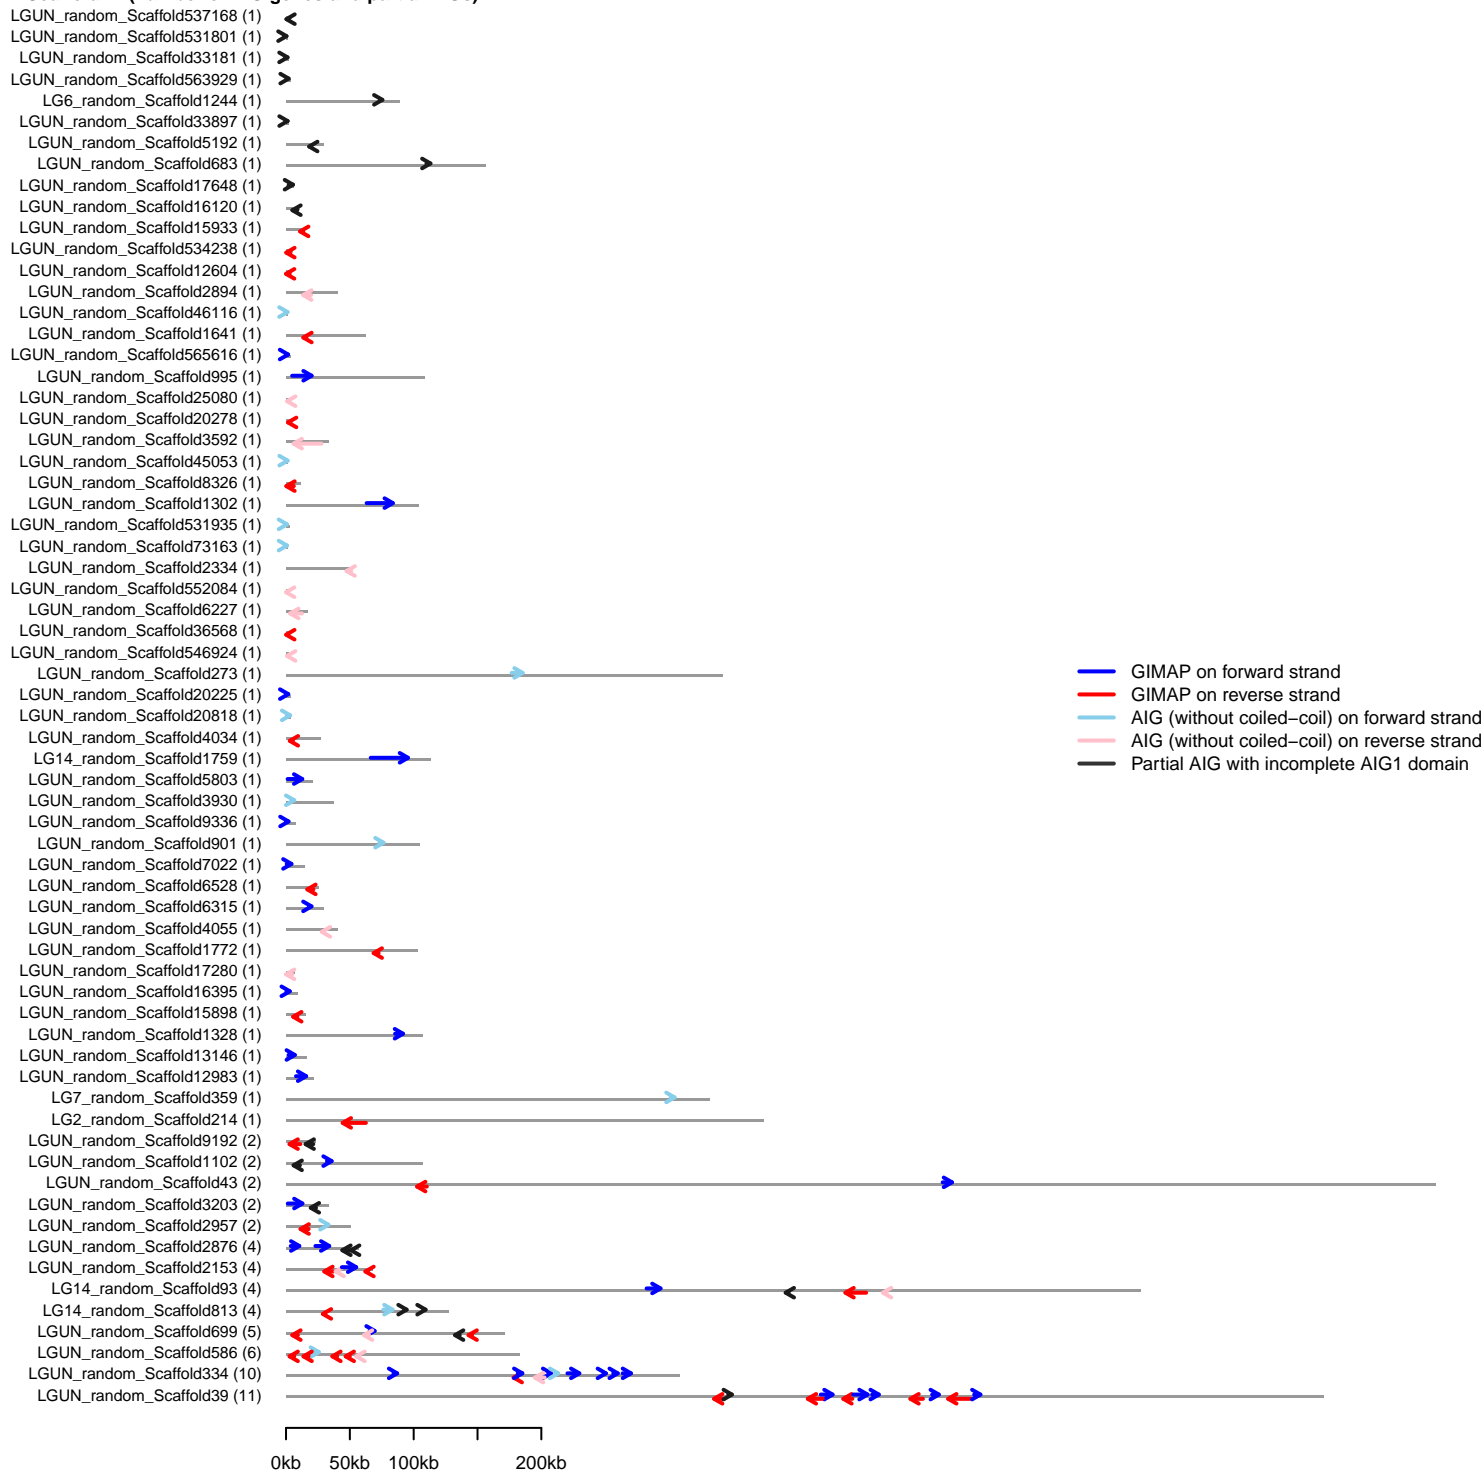

Supplement: 12864_2020_6534_MOESM1_ESM.pdf [file 12864_2020_6534_MOESM1_ESM.pdf]
